# Supplementary material
Source: PubMed Central journal article supplement (PMC5512309)
Supplement: Supp_Fig1.pdf [file Supp_Fig1.pdf]

## Supplementary Data

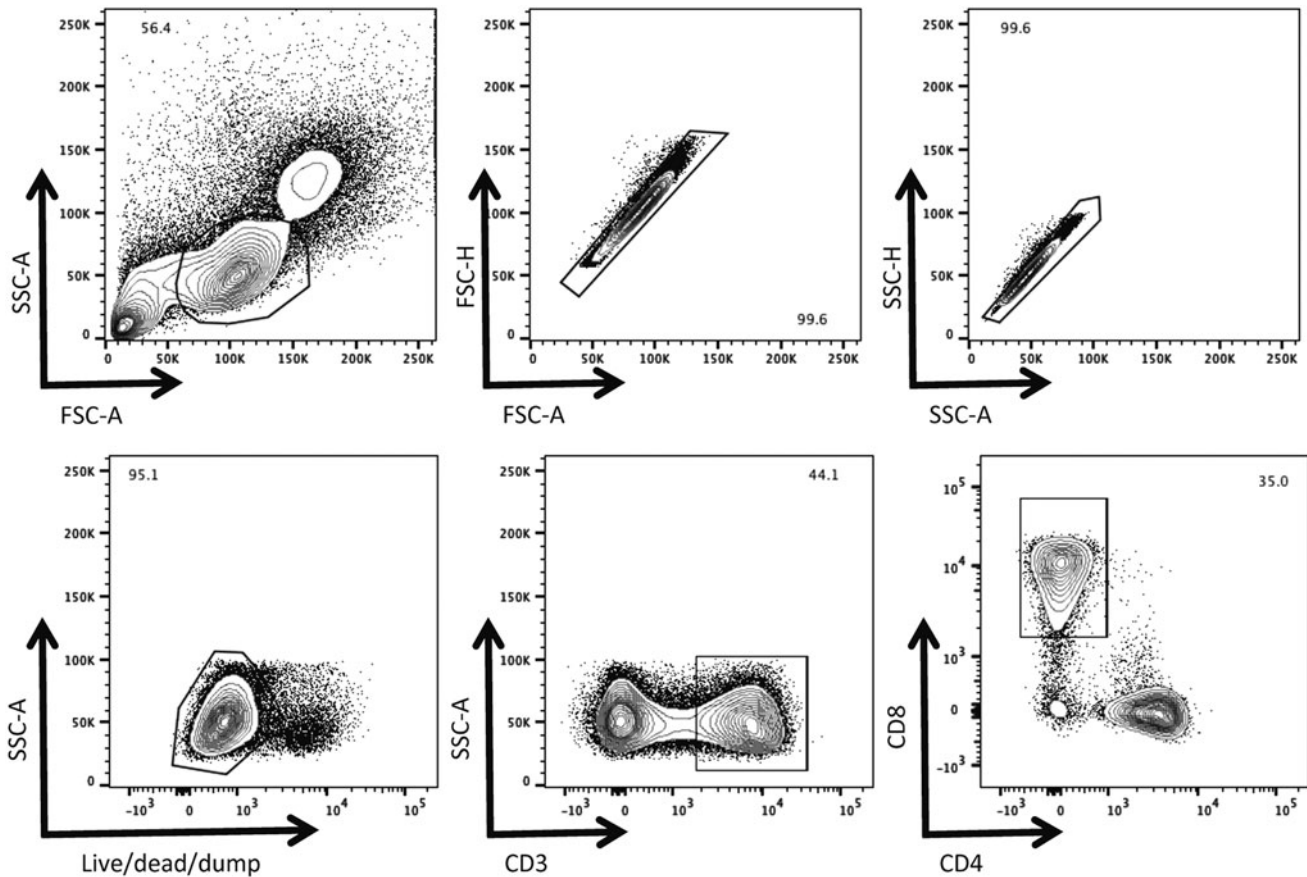

**SUPPLEMENTARY FIG. S1.** Gating strategy for peripheral blood CD8<sup>+</sup> T cells. “Dump” gate includes the following: live/dead stain, anti-CD14, anti-CD19. FSC-A, forward scatter area; FSC-H, forward scatter height; SSC-A, side scatter area; SSC-H, side scatter height.
