# Supplementary material
Source: PubMed Central journal article supplement (PMC5512309)
Supplement: Supp_Fig2.pdf [file Supp_Fig2.pdf]

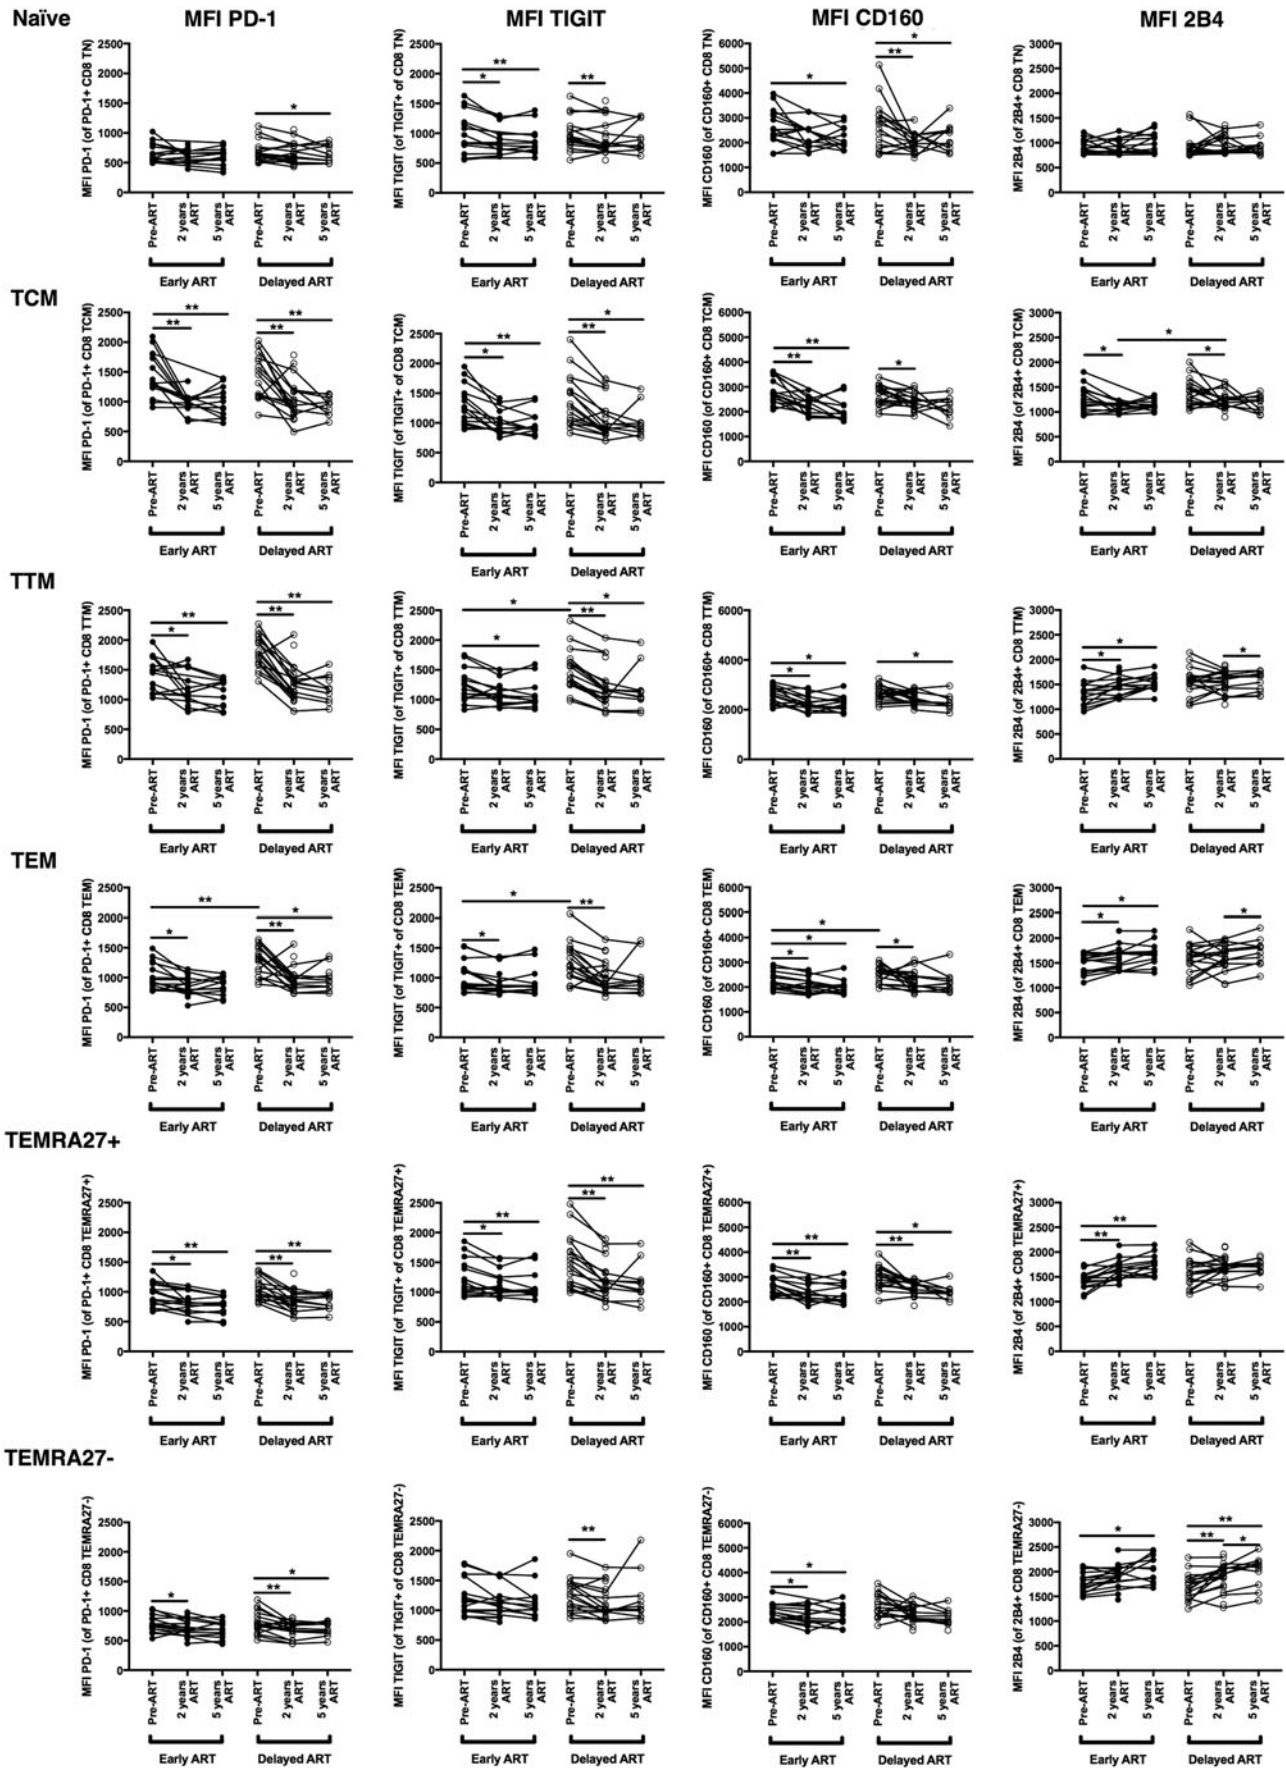

**SUPPLEMENTARY FIG. S2.** Exhaustion marker expression (MFI) in all CD8<sup>+</sup> T cell subsets. The MFI of the cells that fall within the positive gate for the four exhaustion markers is shown. \**p* < .05, \*\**p* < .01. MFI, median fluorescence intensity.
